# Supplementary material
Source: publisher figshare collection journal article supplement (https://asha.figshare.com/articles/dataset/_/19555213)
Supplement: Supplementary file 1 [file 1]

**Supplemental Material S7.** Behavior Change Techniques BCTs identified based in intervention functions selected in Step 5.

| <b>Intervention function</b> | <b>COM-B component</b>                            | <b>Most frequently used BCTs</b>                                      | <b>Does the policy meet the APEASE criteria?</b>                    |
|------------------------------|---------------------------------------------------|-----------------------------------------------------------------------|---------------------------------------------------------------------|
| Education                    | Psychological capability<br>Reflective motivation | Information about social and environmental consequences               | Yes, encouraging social support and environmental adaptations       |
|                              |                                                   | Information about health consequences                                 | Yes, outlining the effects of anxiety and relaxation                |
|                              |                                                   | Feedback on behavior                                                  | Yes, delivered by weekly guidance                                   |
|                              |                                                   | Feedback on outcome(s) of the behavior                                | Yes, delivered by weekly guidance                                   |
|                              |                                                   | Prompts/cues                                                          | Yes, through reminder messages and encouragement to use own prompts |
|                              |                                                   | Self-monitoring of behavior                                           | Yes, encouraged by weekly diary completion                          |
| Persuasion                   | Reflective motivation                             | Credible source                                                       | Yes, outlining evidence behind the strategies used                  |
|                              |                                                   | Information about social and environmental consequences               | Yes, encouraging social support and environmental adaptations       |
|                              |                                                   | Information about health consequences                                 | Yes, outlining the effects of anxiety and relaxation                |
|                              |                                                   | Feedback on behavior                                                  | Yes, delivered by weekly guidance                                   |
|                              |                                                   | Feedback on outcome(s) of the behavior                                | Yes, delivered by weekly guidance                                   |
| Incentivization              | Reflective motivation                             | Feedback on behavior                                                  | Yes, delivered by weekly guidance                                   |
|                              |                                                   | Feedback on outcome(s) of the behavior                                | Yes, delivered by weekly guidance                                   |
|                              |                                                   | Monitoring of behavior by others without evidence of feedback         | Unlikely to be effective in this context                            |
|                              |                                                   | Monitoring outcome of behavior by others without evidence of feedback | Unlikely to be effective in this context                            |
|                              |                                                   | Self-monitoring of behavior                                           | Yes, encouraged by weekly diary completion                          |
| Coercion                     | Reflective motivation                             | Feedback on behavior                                                  | As above                                                            |
|                              |                                                   | Feedback on outcome(s) of the behavior                                | As above                                                            |
|                              |                                                   | Monitoring of behavior by others without evidence of feedback         | As above                                                            |
|                              |                                                   | Monitoring outcome of behavior by others without evidence of feedback | As above                                                            |
|                              |                                                   | Self-monitoring of behavior                                           | As above                                                            |
| Training                     | Physical capability<br>Psychological capability   | Demonstration of the behavior                                         | Yes                                                                 |

|                                                                                                                                                                                                                                                                                                                                                                                                                                                                                                                                        |                                                                           |                                        |                                                                                          |
|----------------------------------------------------------------------------------------------------------------------------------------------------------------------------------------------------------------------------------------------------------------------------------------------------------------------------------------------------------------------------------------------------------------------------------------------------------------------------------------------------------------------------------------|---------------------------------------------------------------------------|----------------------------------------|------------------------------------------------------------------------------------------|
|                                                                                                                                                                                                                                                                                                                                                                                                                                                                                                                                        | Physical opportunity<br>Automatic motivation                              | Instruction on how to perform behavior | Yes                                                                                      |
|                                                                                                                                                                                                                                                                                                                                                                                                                                                                                                                                        |                                                                           | Feedback on behavior                   | Yes, delivered by weekly guidance                                                        |
|                                                                                                                                                                                                                                                                                                                                                                                                                                                                                                                                        |                                                                           | Feedback on outcome(s) of the behavior | Yes, delivered by weekly guidance                                                        |
|                                                                                                                                                                                                                                                                                                                                                                                                                                                                                                                                        |                                                                           | Self-monitoring of behavior            | Yes, encouraged by weekly diary completion                                               |
|                                                                                                                                                                                                                                                                                                                                                                                                                                                                                                                                        |                                                                           | Behavioral practice rehearsal          | Yes, encouraged by weekly diary completion                                               |
| Modelling                                                                                                                                                                                                                                                                                                                                                                                                                                                                                                                              | Social opportunity<br>Reflective motivation<br>Automatic motivation       | Demonstration of the behavior          | Yes, including the use of written guides and videos                                      |
| Enablement                                                                                                                                                                                                                                                                                                                                                                                                                                                                                                                             | Psychological capability<br>Reflective motivation<br>Automatic motivation | Social support (unspecified)           | Yes, encouraging social support                                                          |
|                                                                                                                                                                                                                                                                                                                                                                                                                                                                                                                                        |                                                                           | Social support (practical)             | Yes, encouraging social support by engaging with other individuals experiencing tinnitus |
|                                                                                                                                                                                                                                                                                                                                                                                                                                                                                                                                        |                                                                           | Goal setting (behavior)                | Yes, prior to starting the intervention                                                  |
|                                                                                                                                                                                                                                                                                                                                                                                                                                                                                                                                        |                                                                           | Goal setting (outcome)                 | Yes, monitored during and after completion                                               |
|                                                                                                                                                                                                                                                                                                                                                                                                                                                                                                                                        |                                                                           | Adding objects to the environment      | Not practical to deliver                                                                 |
|                                                                                                                                                                                                                                                                                                                                                                                                                                                                                                                                        |                                                                           | Problem solving                        | Yes, including relapse prevention                                                        |
|                                                                                                                                                                                                                                                                                                                                                                                                                                                                                                                                        |                                                                           | Action planning                        | Yes, including relapse prevention                                                        |
|                                                                                                                                                                                                                                                                                                                                                                                                                                                                                                                                        |                                                                           | Self-monitoring of behavior            | Yes, encouraged by weekly diary completion                                               |
|                                                                                                                                                                                                                                                                                                                                                                                                                                                                                                                                        |                                                                           | Restructuring the physical environment | Yes, encouraged to reduce difficulties with sleep, focus, and hearing                    |
|                                                                                                                                                                                                                                                                                                                                                                                                                                                                                                                                        |                                                                           | Review behavior goal(s)                | Yes, weekly and after completion of the intervention                                     |
|                                                                                                                                                                                                                                                                                                                                                                                                                                                                                                                                        |                                                                           | Review outcome goal(s)                 | Yes, monitored during and after the intervention                                         |
| <b>Most frequently used BCTs selected:</b><br>Information about social and environmental consequences<br>Information about health consequences<br>Prompts/cues<br>Self-monitoring of behavior<br>Credible source<br>Demonstration of the behavior<br>Instruction on how to perform behavior<br>behavioral practice rehearsal<br>Social support (unspecified)<br>Social support (practical)<br>Goal setting (behavior)<br>Goal setting (outcome)<br>Problem solving<br>Action planning<br>Review behavior goals<br>Review outcome goals |                                                                           |                                        |                                                                                          |
