# Supplementary material
Source: publisher figshare collection journal article supplement (https://asha.figshare.com/articles/dataset/_/19555213)
Supplement: Supplementary file 2 [file 1]

**Supplemental Material S8.** Identification of the mode(s) through which the intervention could be delivered.

| Mode of delivery |                  |                                        |                              | Does the policy meet the APEASE criteria in the context of facilitating an adaptive response to tinnitus? |
|------------------|------------------|----------------------------------------|------------------------------|-----------------------------------------------------------------------------------------------------------|
| In-person        | Individual       |                                        |                              | Possible                                                                                                  |
|                  | Group            |                                        |                              | Possible                                                                                                  |
| Distance         | Population-level | Broadcast media                        | TV                           | No                                                                                                        |
|                  |                  |                                        | Radio                        | No                                                                                                        |
|                  |                  |                                        | Billboard                    | No                                                                                                        |
|                  |                  |                                        | Poster                       | No                                                                                                        |
|                  |                  |                                        | Newspaper                    | No                                                                                                        |
|                  |                  |                                        | Leaflet                      | No                                                                                                        |
|                  |                  |                                        | Internet or web app function | Yes, the present intervention discussed                                                                   |
|                  |                  |                                        | Mobile app                   | Possible but expensive                                                                                    |
|                  | Individual-level | Phone                                  | Phone helpline               | No                                                                                                        |
|                  |                  |                                        | Mobile phone text            | No                                                                                                        |
|                  |                  | Individually accessed computer program |                              | Possible                                                                                                  |
