# Supplementary material
Source: publisher figshare collection journal article supplement (https://asha.figshare.com/articles/dataset/_/19555213)
Supplement: Supplementary file 3 [file 1]

**Supplemental Material S3.** Describe the target behavior according to who needs to do what, when, where, how often, and with whom.

| <b>Target behavior</b>                                                | <b>Adaptive response to tinnitus</b>                                                                                                                             |
|-----------------------------------------------------------------------|------------------------------------------------------------------------------------------------------------------------------------------------------------------|
| <i>Who</i> needs to perform the behavior?                             | Individual experiencing tinnitus by applying the intervention materials.                                                                                         |
| <i>What</i> do they need to do differently to achieve desired change? | React adaptively to tinnitus by implementing the strategies suggested by the intervention.                                                                       |
| <i>When</i> do they need to do it?                                    | Regularly, initially by daily practice of the strategies, and then anytime as needed until habituation is achieved or the strategy becomes an unconscious habit. |
| <i>Where</i> do they need to do it?                                   | Any context, which may be alone initially and in time also when between other people and in varying contexts.                                                    |
| <i>How often</i> do they need to do it?                               | Ideally daily initially and then as frequently as necessary until habituation is achieved or the strategy becomes an unconscious habit.                          |
| <i>With whom</i> do they need to do it?                               | Alone or together with significant others.                                                                                                                       |
