# Supplementary material
Source: publisher figshare collection journal article supplement (https://asha.figshare.com/articles/dataset/_/19555213)
Supplement: Supplementary file 4 [file 1]

**Supplemental Material S1.** Defining the tinnitus behavior in behavioral terms.

|                                                    |                                                                                                                          |
|----------------------------------------------------|--------------------------------------------------------------------------------------------------------------------------|
| <i>What is the maladaptive behavior?</i>           | Activity avoidance and maladaptive thoughts due to experiencing tinnitus                                                 |
| <i>What is the desired behavior?</i>               | Improving successful management by adaptively responding to tinnitus, resulting in habituation reduced tinnitus distress |
| <i>Where does the behavior occur?</i>              | Any context                                                                                                              |
| <i>Who is involved in performing the behavior?</i> | Individual experiencing bothersome tinnitus                                                                              |
