# Supplementary material
Source: publisher figshare collection journal article supplement (https://asha.figshare.com/articles/dataset/_/19555213)
Supplement: Supplementary file 5 [file 1]

**Supplemental Material S2a.** Candidate behaviors relevant to the problem behavior identified in Step 1.

| <b>Intervention Aim: Adaptively respond to tinnitus to aid habituation</b>                                                                                                                                                                                                                                                                                                                                                                                                                                                                                                                                                                                                                                                                                                                                                                                                                                                                                                                                                                 |
|--------------------------------------------------------------------------------------------------------------------------------------------------------------------------------------------------------------------------------------------------------------------------------------------------------------------------------------------------------------------------------------------------------------------------------------------------------------------------------------------------------------------------------------------------------------------------------------------------------------------------------------------------------------------------------------------------------------------------------------------------------------------------------------------------------------------------------------------------------------------------------------------------------------------------------------------------------------------------------------------------------------------------------------------|
| <b>Intervention designer response</b>                                                                                                                                                                                                                                                                                                                                                                                                                                                                                                                                                                                                                                                                                                                                                                                                                                                                                                                                                                                                      |
| <ul style="list-style-type: none"><li>• Goal setting and monitoring.</li><li>• Increased understanding of tinnitus to adjust reactions to tinnitus.</li><li>• Exercises to encourage deep breathing and lower breathing rate.</li><li>• Reducing muscle tension and arousal by progressive muscle relaxation.</li><li>• Identify maladaptive thoughts resulting in unhelpful behaviors.</li><li>• Cognitively restructuring unhelpful thought patterns for behavioral activation.</li><li>• Engaging in positive imagery to reduce emotional distress and reactions to tinnitus.</li><li>• Reduce avoidance/safety behaviors.</li><li>• Reframing tinnitus-related fears and anxiety.</li><li>• Enhanced problem-solving abilities for relapse prevention.</li><li>• Better attention control to move attention away from tinnitus.</li><li>• Altering behaviors to improve sleep.</li><li>• Ability to listen to tinnitus to reduce tinnitus annoyance.</li><li>• Engaging in monitoring progress through weekly diary keeping.</li></ul> |

**Supplemental Material S2b.** Criteria for prioritizing the identified candidate behaviors.

| <b>Potential target behaviors relevant to improving management of tinnitus</b>      | <b>Impact of behavior change<sup>a</sup></b> | <b>Likelihood of changing behaviors<sup>a</sup></b> | <b>Spill-over score<sup>a</sup> (i.e., impact on other behaviors, such as stress or anxiety)</b> | <b>Measurement score<sup>a</sup> (i.e., monitoring)</b> |
|-------------------------------------------------------------------------------------|----------------------------------------------|-----------------------------------------------------|--------------------------------------------------------------------------------------------------|---------------------------------------------------------|
| Goal setting and monitoring                                                         | Promising                                    | Promising                                           | Promising                                                                                        | Promising                                               |
| Increased understanding of tinnitus to adjust reactions to tinnitus                 | Promising                                    | Promising                                           | Very promising                                                                                   | Unpromising but worth considering                       |
| Exercises to encourage deep breathing and lower breathing rate                      | Promising                                    | Promising                                           | Very promising                                                                                   | Promising                                               |
| Reducing muscle tension and arousal by progressive muscle relaxation                | Promising                                    | Promising                                           | Very promising                                                                                   | Promising                                               |
| Identify maladaptive thoughts resulting in unhelpful behaviors                      | Promising                                    | Promising                                           | Very promising                                                                                   | Promising                                               |
| Restructuring unhelpful thought patterns for behavioral activation                  |                                              | Promising                                           | Very promising                                                                                   | Promising                                               |
| Engaging in positive imagery to reduce emotional distress and reactions to tinnitus | Promising                                    | Promising                                           | Very promising                                                                                   | Promising                                               |
| Reduce avoidance/safety behaviors                                                   | Promising                                    | Promising                                           | Very promising                                                                                   | Unpromising but worth considering                       |
| Less hindered by fears or anxiety regarding tinnitus                                | Promising                                    | Promising                                           | Very promising                                                                                   | Unpromising but worth considering                       |
| Increase problem solving abilities for relapse prevention                           | Promising                                    | Promising                                           | Very promising                                                                                   | Unpromising but worth considering                       |
| Attention control to move attention away from tinnitus                              | Promising                                    | Promising                                           | Promising                                                                                        | Unpromising but worth considering                       |
| Altering behaviors to improve sleep                                                 | Promising                                    | Promising                                           | Promising                                                                                        | Promising                                               |
| Ability to listen to tinnitus to reduce tinnitus annoyance                          | Promising                                    | Promising                                           | Promising                                                                                        | Unpromising but worth considering                       |
| Writing a weekly diary                                                              | Promising                                    | Promising                                           | Promising                                                                                        | Promising                                               |

<sup>a</sup> Rate as: unacceptable, unpromising but worth considering, promising, very promising
