# Supplementary material
Source: publisher figshare collection journal article supplement (https://asha.figshare.com/articles/dataset/_/19555213)
Supplement: Supplementary file 6 [file 1]

**Supplemental Material S5.** Consideration of the candidate intervention functions using the APEASE criteria.

| <b>Candidate intervention function</b> | <b>Definition</b>                                                                                                                                        | <b>COM-B component</b>                                                                                                                                                                                                                                                                                                                                                                                                                                                                                                                                                                                                                                                                                                | <b>Meet the APEASE criteria?</b> |
|----------------------------------------|----------------------------------------------------------------------------------------------------------------------------------------------------------|-----------------------------------------------------------------------------------------------------------------------------------------------------------------------------------------------------------------------------------------------------------------------------------------------------------------------------------------------------------------------------------------------------------------------------------------------------------------------------------------------------------------------------------------------------------------------------------------------------------------------------------------------------------------------------------------------------------------------|----------------------------------|
| Education                              | Increasing knowledge or understanding (e.g., <i>providing information to promote an adaptive response to tinnitus</i> )                                  | <p><b><i>Psychological capability</i></b></p> <ul style="list-style-type: none"> <li>Educate about ways of enacting the desired behavior/ avoiding undesired behaviors via educational modules and videos.</li> </ul> <p><b><i>Reflective motivation</i></b></p> <ul style="list-style-type: none"> <li>Educate to create more positive beliefs about the desired behavior.</li> </ul>                                                                                                                                                                                                                                                                                                                                | Yes                              |
| Persuasion                             | Using communication to induce positive or negative feelings or stimulate action (e.g., <i>using imagery to motivate adaptive responses to tinnitus</i> ) | <p><b><i>Reflective motivation</i></b></p> <ul style="list-style-type: none"> <li>Persuade to create more positive beliefs about the desired behavior.</li> <li>Persuade to feel more positively about the desired behavior.</li> </ul>                                                                                                                                                                                                                                                                                                                                                                                                                                                                               | Yes                              |
| Incentivization                        | Creating an expectation of reward (e.g., <i>highlight the benefits of engaging in an adaptive response to tinnitus</i> )                                 | <p><b><i>Reflective motivation</i></b></p> <ul style="list-style-type: none"> <li>Incentivize to feel more positively about the desired behavior.</li> <li>Goal setting with the view of improving quality of life and engaging and participating in activities.</li> </ul>                                                                                                                                                                                                                                                                                                                                                                                                                                           | Yes                              |
| Coercion                               | Creating an expectation of punishment or cost (e.g., <i>highlighting how no action will not improve tinnitus</i> )                                       | <p><b><i>Reflective motivation</i></b></p> <ul style="list-style-type: none"> <li>Coerce to feel more positively about the desired behavior.</li> </ul>                                                                                                                                                                                                                                                                                                                                                                                                                                                                                                                                                               | Yes                              |
| Training                               | Imparting skills (e.g., <i>training to facilitate an adaptive response to tinnitus</i> )                                                                 | <p><b><i>Physical capability</i></b></p> <ul style="list-style-type: none"> <li>Train physical skills required for the desired behavior through step-by-step instructions and demonstration videos.</li> </ul> <p><b><i>Psychological capability</i></b></p> <ul style="list-style-type: none"> <li>Train cognitive skills required for the desired behavior.</li> <li>Train development of mental strength required for desired behavior.</li> <li>Train sustained resistance to undesired behavior(s).</li> </ul> <p><b><i>Physical opportunity</i></b></p> <ul style="list-style-type: none"> <li>Train to reduce competing time demands.</li> <li>Train to provide cues/ prompts for desired behavior.</li> </ul> | Yes                              |

|                             |                                                                                                                                                                                                  |                                                                                                                                                                                                                                                                                                                                                                                                                                                                                                                                                                                                  |                   |
|-----------------------------|--------------------------------------------------------------------------------------------------------------------------------------------------------------------------------------------------|--------------------------------------------------------------------------------------------------------------------------------------------------------------------------------------------------------------------------------------------------------------------------------------------------------------------------------------------------------------------------------------------------------------------------------------------------------------------------------------------------------------------------------------------------------------------------------------------------|-------------------|
|                             |                                                                                                                                                                                                  | <b><i>Automatic motivation</i></b> <ul style="list-style-type: none"> <li>Train to strengthen habitual engagement in the desired behavior.</li> </ul>                                                                                                                                                                                                                                                                                                                                                                                                                                            |                   |
| Restriction                 | Using rules to increase the opportunity to engage in the target behavior/ reduce opportunity to engage in competing behaviors<br>(e.g., <i>Prohibiting a non-adaptive response to tinnitus</i> ) | <b><i>Physical/ Social opportunity</i></b> <ul style="list-style-type: none"> <li>Restriction to reduce undesired behavior(s) surrounding habits that have a negative impact (e.g., for sleep).</li> </ul>                                                                                                                                                                                                                                                                                                                                                                                       | <b><i>Yes</i></b> |
| Environmental restructuring | Changing the physical or social context<br>(e.g., <i>providing reminders to encourage an adaptive response to tinnitus</i> )                                                                     | <b><i>Physical opportunity</i></b> <ul style="list-style-type: none"> <li>Restructure the environment to reduce competing time demands.</li> <li>Restructure the environment to provide cues and prompts for desired behavior.</li> <li>Restructure the environment to reduce difficulties regarding concentration, sleep and hearing difficulties.</li> </ul> <b><i>Social opportunity</i></b> <ul style="list-style-type: none"> <li>Restructure the environment to increase social support.</li> </ul>                                                                                        | Yes               |
| Modelling                   | Providing an example for people to aspire to or imitate<br>(e.g., <i>expert videos, using patient testimonials/ dramatizations of how they have adaptively responded to tinnitus</i> )           | <b><i>Social opportunity</i></b> <ul style="list-style-type: none"> <li>Modelling to shape people’s ways of thinking.</li> </ul> <b><i>Reflective motivation</i></b> <ul style="list-style-type: none"> <li>Model to feel more positively about the desired behavior.</li> </ul> <b><i>Automatic motivation</i></b> <ul style="list-style-type: none"> <li>model desired behavior to induce automatic imitation.</li> </ul>                                                                                                                                                                      | Yes               |
| Enablement                  | Increasing means/ reducing barriers to increase capability or opportunity<br>(e.g., <i>behavioral support to adaptively respond to tinnitus</i> )                                                | <b><i>Psychological capability</i></b> <ul style="list-style-type: none"> <li>Enable development of mental strength required for desired behavior through the strategies provided.</li> <li>Enable sustained resistance to undesired behavior(s) through the strategies provided.</li> </ul> <b><i>Reflective motivation</i></b> <ul style="list-style-type: none"> <li>Enable to feel more positively about the desired behavior.</li> </ul> <b><i>Automatic motivation</i></b> <ul style="list-style-type: none"> <li>Enable to strengthen habitual engagement in desired behavior.</li> </ul> | Yes               |
