# Supplementary material
Source: publisher figshare collection journal article supplement (https://asha.figshare.com/articles/dataset/_/19555213)
Supplement: Supplementary file 7 [file 1]

**Supplemental Material S4.** Behavioral analysis of what needs to change for the target behavior to occur.

| COM-B components         | Theoretical domains linking to COM-B component                                                                                                  | What needs to happen for target behavior to occur?                                                                                                                                                                                                                                                                                                                                               |
|--------------------------|-------------------------------------------------------------------------------------------------------------------------------------------------|--------------------------------------------------------------------------------------------------------------------------------------------------------------------------------------------------------------------------------------------------------------------------------------------------------------------------------------------------------------------------------------------------|
| Physical capability      | Physical skills<br><i>Do you know how to adaptively respond to tinnitus?</i>                                                                    | <ul style="list-style-type: none"> <li>Have better physical skills to adaptively respond to tinnitus such as engaging in deep breathing to lower breathing rate and progressive muscle relaxation.</li> </ul>                                                                                                                                                                                    |
| Psychological capability | Knowledge<br><i>Do you know about adaptive responses to tinnitus?</i>                                                                           | <ul style="list-style-type: none"> <li>Have a better understanding of tinnitus, the effects of tinnitus and ways to adaptively responding to it.</li> </ul>                                                                                                                                                                                                                                      |
|                          | Memory, decision, and attention processes<br><i>Is adaptively responding to tinnitus something you usually do?</i>                              | <ul style="list-style-type: none"> <li>Develop new habits to adaptively respond to tinnitus in a more positive way.</li> <li>Identifying negative thoughts and emotions related to tinnitus.</li> <li>Reduce unhelpful feelings or thoughts about tinnitus.</li> </ul>                                                                                                                           |
|                          | Behavioral regulation<br><i>Do you have systems in place for monitoring whether you are adaptively responding to tinnitus?</i>                  | <ul style="list-style-type: none"> <li>Develop skills of goal-setting and self-monitoring.</li> <li>Use a weekly diary to monitor responses to tinnitus.</li> </ul>                                                                                                                                                                                                                              |
| Physical opportunity     | Environmental context and resources<br><i>To what extent do physical or resource factors facilitate/hinder an adaptive respond to tinnitus?</i> | <ul style="list-style-type: none"> <li>Create more time during the day to engage with the intervention content.</li> <li>Create daily sessions for active relaxation and practicing the suggested intervention strategies.</li> <li>Applying the strategies suggested when tinnitus is problematic.</li> <li>Have reminders/prompts to practice strategies until they become a habit.</li> </ul> |
| Social opportunity       | Social influences<br><i>To what extent do social influences facilitate/hinder an adaptive response to tinnitus?</i>                             | <ul style="list-style-type: none"> <li>Support from friends/family to regularly engage with the intervention and practice the strategies.</li> </ul>                                                                                                                                                                                                                                             |

|                                                              |                                                                                                                                                                                                                                                                                                                                                                                                                                    |                                                                                                                                                                                                                                                                                                                                                                                                                                                                                |
|--------------------------------------------------------------|------------------------------------------------------------------------------------------------------------------------------------------------------------------------------------------------------------------------------------------------------------------------------------------------------------------------------------------------------------------------------------------------------------------------------------|--------------------------------------------------------------------------------------------------------------------------------------------------------------------------------------------------------------------------------------------------------------------------------------------------------------------------------------------------------------------------------------------------------------------------------------------------------------------------------|
|                                                              |                                                                                                                                                                                                                                                                                                                                                                                                                                    | <ul style="list-style-type: none"> <li>Engage with or learning from other individuals experiencing tinnitus for additional support.</li> </ul>                                                                                                                                                                                                                                                                                                                                 |
| Reflective motivation                                        | <p>Beliefs about capabilities<br/><i>How difficult is it for you to adaptively respond to tinnitus?</i></p> <p>Optimism<br/><i>How confident are you that adaptively responding to tinnitus will improve quality of life?</i></p> <p>Belief about consequences<br/><i>What do you think will happen if you adaptively respond to tinnitus?</i></p> <p>Goals<br/><i>How much do you want to adaptively respond to tinnitus?</i></p> | <ul style="list-style-type: none"> <li>Hold beliefs that adaptively responding to tinnitus is possible.</li> <li>Believing that adaptively responding to tinnitus is important to reduce negative consequences.</li> <li>Believing that adaptively responding to tinnitus will result in positive outcomes.</li> <li>Mental representations of outcomes or end states that the individual wants to achieve.</li> <li>Goal setting and monitoring to add motivation.</li> </ul> |
| Automatic motivation                                         | <p>Reinforcement<br/><i>Are their incentives to regularly adaptively respond to tinnitus?</i></p>                                                                                                                                                                                                                                                                                                                                  | <ul style="list-style-type: none"> <li>Develop an established routines and habits for adaptively responding to tinnitus to alleviate negative consequences.</li> <li>Completing weekly diaries.</li> <li>Engaging with professional guidance during the intervention delivery.</li> </ul>                                                                                                                                                                                      |
| <b>Behavioral diagnosis of the relevant COM-B components</b> | Physical/psychological capability, physical/social opportunity, and reflective/automatic motivation need to change for the target behavior to occur.                                                                                                                                                                                                                                                                               |                                                                                                                                                                                                                                                                                                                                                                                                                                                                                |
