# Supplementary material
Source: publisher figshare collection journal article supplement (https://asha.figshare.com/articles/dataset/_/19555213)
Supplement: Supplementary file 8 [file 1]

**Supplemental Material S6.** Policy categories that might support the identified intervention functions.

| Intervention function                                        | COM-B component                                                                                 | Potential policy categories     | Does the policy meet the APEASE criteria in the context of facilitating an adaptive response to tinnitus? |
|--------------------------------------------------------------|-------------------------------------------------------------------------------------------------|---------------------------------|-----------------------------------------------------------------------------------------------------------|
| Education                                                    | Psychological capability<br>Reflective motivation                                               | Communication/marketing         | Not applicable in this context                                                                            |
|                                                              |                                                                                                 | Guidelines                      | Possible in the long-term but not present                                                                 |
|                                                              |                                                                                                 | Regulation                      | Not relevant in this context                                                                              |
|                                                              |                                                                                                 | Legislation                     | Not relevant in this context                                                                              |
|                                                              |                                                                                                 | Service provision               | Possible in the long-term but not presently                                                               |
| Persuasion                                                   | Reflective motivation                                                                           | Communication/marketing         | Not applicable in this context                                                                            |
|                                                              |                                                                                                 | Guidelines                      | Possible in the long-term but not present                                                                 |
|                                                              |                                                                                                 | Regulation                      | Not relevant in this context                                                                              |
|                                                              |                                                                                                 | Legislation                     | Not relevant in this context                                                                              |
|                                                              |                                                                                                 | Service provision               | Possible in the long-term but not presently                                                               |
| Incentivization                                              | Reflective motivation                                                                           | Communication/marketing         | Not applicable in this context                                                                            |
|                                                              |                                                                                                 | Guidelines                      | Not practicable in this context                                                                           |
|                                                              |                                                                                                 | Fiscal measures                 | Not relevant in this context                                                                              |
|                                                              |                                                                                                 | Regulation                      | Not relevant in this context                                                                              |
|                                                              |                                                                                                 | Legislation                     | Not relevant in this context                                                                              |
|                                                              |                                                                                                 | Service provision               | Possible in the long-term but not presently                                                               |
| Coercion                                                     | Reflective motivation                                                                           | Communication/marketing         | Not practicable in this context                                                                           |
|                                                              |                                                                                                 | Guidelines                      | Possible in the long-term but not present                                                                 |
|                                                              |                                                                                                 | Fiscal measures                 | Not relevant in this context                                                                              |
|                                                              |                                                                                                 | Regulation                      | Not relevant in this context                                                                              |
|                                                              |                                                                                                 | Legislation                     | Not relevant in this context                                                                              |
|                                                              |                                                                                                 | Service provision               | Possible in the long-term but not presently                                                               |
| Training                                                     | Physical capability<br>Psychological capability<br>Physical opportunity<br>Automatic motivation | Guidelines                      | Possible in the long-term but not present                                                                 |
|                                                              |                                                                                                 | Fiscal measures                 | Not relevant in this context                                                                              |
|                                                              |                                                                                                 | Regulation                      | Not relevant in this context                                                                              |
|                                                              |                                                                                                 | Legislation                     | Not relevant in this context                                                                              |
|                                                              |                                                                                                 | Service provision               | Possible in the long-term but not present                                                                 |
| Modelling                                                    | Social opportunity<br>Reflective motivation<br>Automatic motivation                             | Communication/marketing         | Not applicable in this context                                                                            |
|                                                              |                                                                                                 | Service provision               | Possible in the long-term but not presently                                                               |
| Enablement                                                   | Psychological capability<br>Reflective motivation<br>Automatic motivation                       | Guidelines                      | Not relevant in this context                                                                              |
|                                                              |                                                                                                 | Fiscal measures                 | Not relevant in this context                                                                              |
|                                                              |                                                                                                 | Regulation                      | Not relevant in this context                                                                              |
|                                                              |                                                                                                 | Legislation                     | Not relevant in this context                                                                              |
|                                                              |                                                                                                 | Environment/<br>social planning | Not practical in this context                                                                             |
|                                                              |                                                                                                 | Service provision               | Possible in the long-term but not presently                                                               |
| Policy categories selected: Guidelines and service provision |                                                                                                 |                                 |                                                                                                           |
